# Supplementary material
Source: PubMed Central journal article supplement (PMC7685556)
Supplement: JB.00232-20-s0001.pdf [file JB.00232-20-s0001.pdf]

Figure S1

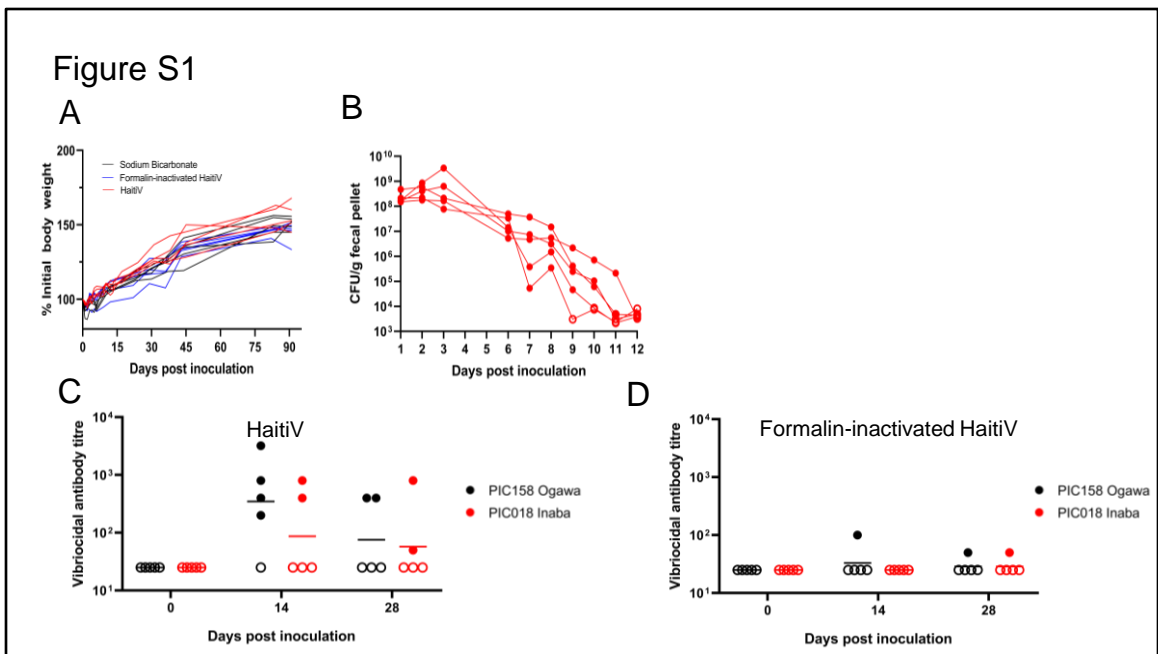

Fig S1. Vaccine colonization kinetics and elicited immune responses from cohort two mice that delivered pups used for the infant mouse challenges. 5 female mice from each group were streptomycin treated as detailed previously, and vaccinated with HaitiV, formalin-inactivated HaitiV, or vehicle buffer on day 0. A) All mice in this cohort gained weight over the course of this longitudinal study. B) HaitiV vaccinated mice shed the vaccine with kinetics consistent with the previous cohort one data and stopped shedding detectable levels CFUs of the vaccine by 12dpi. C) Circulating vibriocidal titers from cohort two HaitiV vaccinated mice. D) Circulating vibriocidal titers from formalin inactivated cohort two HaitiV vaccinated mice. Open symbol denote antibody titers below the limit of detection.
